# Supplementary material for: SERS and Indicator Paper Sensing of Hydrogen Peroxide Using Au@Ag Nanorods
Source: MDPI journal article supplement (doi:10.3390/s22093202), 2022-04-21
Supplement: s1 [file s1]

## SERS and Indicator Paper Sensing of Hydrogen Peroxide Using Au@Ag Nanorods

Boris N. Khlebtsov <sup>1,\*</sup>, Andrey M. Burov <sup>1</sup>, Andrey M. Zakharevich <sup>2</sup> and Nikolai G. Khlebtsov <sup>1,2</sup>

<sup>1</sup> Institute of Biochemistry and Physiology of Plants and Microorganisms, Saratov Scientific Centre of the Russian Academy of Sciences (IBPPM RAS), 410049 Saratov, Russia; burov\_a@ibppm.ru (A.M.B.); khlebtsov\_n@ibppm.ru (N.G.K.)

<sup>2</sup> Science Medical Center, Saratov State University, 410012 Saratov, Russia; lab-15@mail.ru

\* Correspondence: khlebtsov\_b@ibppm.ru; Tel.: +7-8452-97-0403

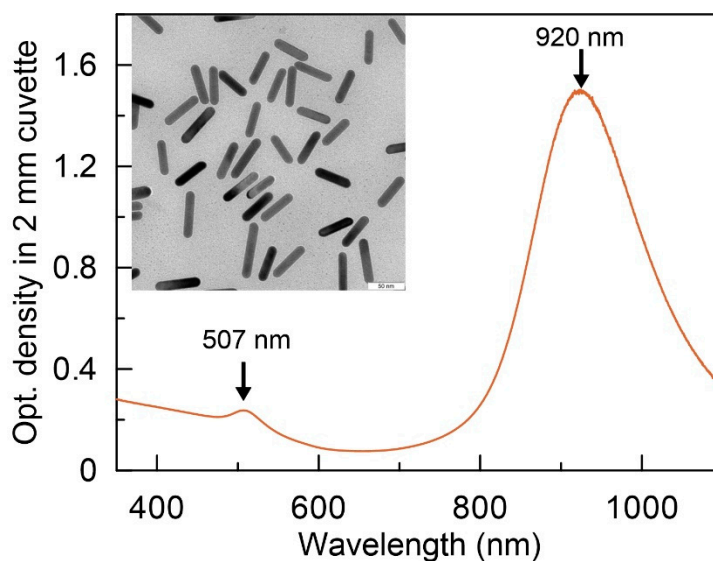

**Figure S1.** Extinction spectra of AuNRs. The insert shows a typical TEM image of the nanorods.

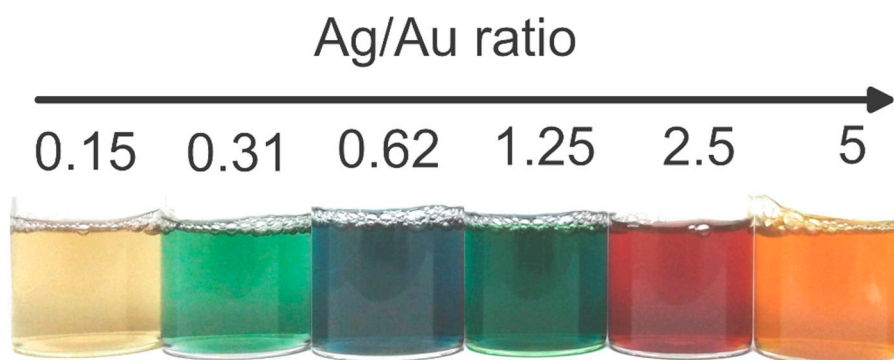

**Figure S2.** Color changes during the growth of a silver shell on the surface of a gold nanorod at various Ag/Au molar ratios.

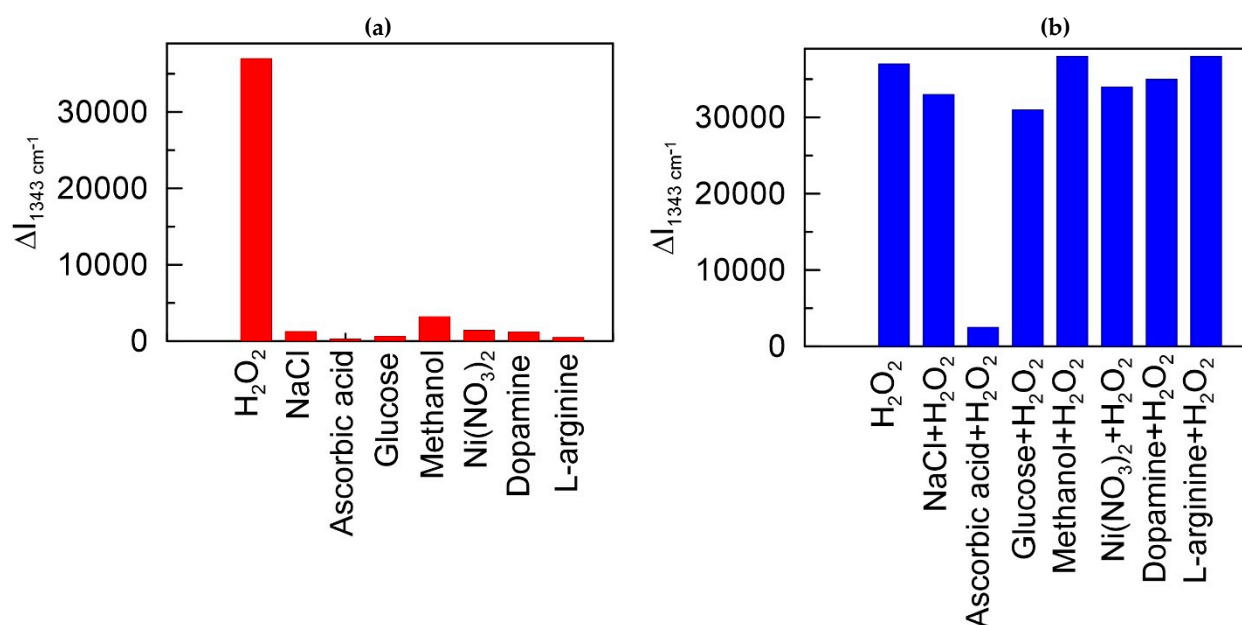

**Figure S3.** Possible interferences tested with the H<sub>2</sub>O<sub>2</sub> sensor: (a) 10 mM H<sub>2</sub>O<sub>2</sub>, sodium chloride, ascorbic acid, glucose, methanol, nickel nitrate, dopamine, l-arginine; (b) adding another 10 mM H<sub>2</sub>O<sub>2</sub> in the above solutions.

**Table S1.** Comparison of the sensitivity and speed of various methods for the determination of hydrogen peroxide.

| Nanoparticle type             | Detection method | Detection range | Time for assay | Reference  |
|-------------------------------|------------------|-----------------|----------------|------------|
| Biogenic silver nanoparticles | Colorimetric     | 1-10 mM         | 1 hour         | [20]       |
| Ag nanospheres                | Colorimetric     | 0.1-50 mM       | 1 hour         | [42]       |
| Silver/carbon nanomaterial    | Colorimetric     | 0.01-0.2 mM     | 30 min         | [19]       |
| Ag nanocubes                  |                  | 1-10 mM         |                |            |
| Ag nanospheres                | Colorimetric     | 0.1-10 mM       | 2 hour         | [24]       |
| Ag prisms                     |                  | 0.02-10 mM      |                |            |
| Fluorescent/Ag microparticles | Fluorescence     | 0.001-0.5 mM    | 1 hour         | [17]       |
| Ag NP-assembled substrate     | SERS             | 0.01-0.1 mM     | 2 hour         | [26]       |
| Au@Ag nanospheres             | SERS             | 0.01-0.3 M      | 2 hour         | [31]       |
| Au@Ag nanorods                | SERS             | 0.1-20 mM       | 1 hour         | This paper |
| Indicator paper               | Naked eye        | 1-50 mM         | 10 min         | This paper |

## References

- Lu, H.; Yu, C.; Quan, S.; Xu, S. A novel dual response ratiometric fluorescent probe for the determination of H<sub>2</sub>O<sub>2</sub> and glucose via etching of silver nanoparticles. *Analyst* **2019**, *144*, 1153–1158.
- Hou, W.; Liu, X.; Lu, Q.; Liu, M.; Zhang, Y.; Yao, Sh. Etching and anti-etching strategy for sensitive colorimetric sensing of H<sub>2</sub>O<sub>2</sub> and biothiols based on silver/carbon nanomaterial. *Colloids Surf. B Biointerfaces* **2018**, *162*, 118–125.
- Roy, K.; Sarkar, Ch.K.; Ghosh, Ch.K. Fast colourimetric detection of H<sub>2</sub>O<sub>2</sub> by biogenic silver nanoparticles synthesised using *Benincasa hispida* fruit extract. *Nanotechnol. Rev.* **2016**, *5*, 251–258.
- Li, Y.; Wang, Y.; Fu, C.; Wu, Y.; Cao, H.; Shia, W.; Jung, Y.M. A simple enzyme-free SERS sensor for the rapid and sensitive detection of hydrogen peroxide in food. *Analyst* **2020**, *145*, 607–612.
- Zhang, L.; Li, L. Colorimetric detection of hydrogen peroxide using silver nanoparticles with three different morphologies. *Anal. Meth.* **2016**, *8*, 6691–6695.

31. Wang, X.; Zhang, K.; Tan, X.; Zhang, Y.; Bai, L.; Xie, W. Etchable SERS nanosensor for accurate pH and hydrogen peroxide sensing in living cells *Chem. Commun.* **2019**, *55*, 12996–12999.
42. Meng, F.; Zhu, X.; Miao, P. Study of autocatalytic oxidation reaction of silver nanoparticles and the application for nonenzymatic H<sub>2</sub>O<sub>2</sub> assay. *Chem. Phys. Lett.* **2015**, *635*, 213–216.
